# Supplementary material for: Introducing a Fresh Cadaver Model for Ultrasound-guided Central Venous Access Training in Undergraduate Medical Education
Source: PubMed Central journal article supplement (PMC4899071; doi:10.5811/westjem.2016.3.30069), 2016-05-05
Supplement: wjem-17-362-s002.pdf [file wjem-17-362-s002.pdf]

## Appendix B: Internal Jugular Vein (IJV) Central Line Cannulation Checklist

|                                                                                          |          |          |
|------------------------------------------------------------------------------------------|----------|----------|
| 1. Prepare and drape the area:                                                           | <b>0</b> | <b>1</b> |
| 2. Identify the correct transducer:                                                      | <b>0</b> | <b>1</b> |
| 3. Identify the necessary equipment needed for the procedure:                            |          |          |
| a. Some of the equipment necessary for procedure identified.                             | <b>0</b> | <b>1</b> |
| b. Most of the equipment necessary for procedure identified.                             | <b>0</b> | <b>1</b> |
| c. All of the equipment necessary for procedure identified.                              | <b>0</b> | <b>1</b> |
| 4. Places US probe in the correct anatomic location for IJV localization                 | <b>0</b> | <b>2</b> |
| 5. Identifies vein by its compressibility characteristics.                               | <b>0</b> | <b>2</b> |
| 6. Places needle in correct angle to skin with bevel up                                  | <b>0</b> | <b>2</b> |
| 7. Aspirates as the needle advances towards the vein.                                    | <b>0</b> | <b>2</b> |
| 8. Obtains a flash back of fluid.                                                        | <b>0</b> | <b>3</b> |
| 9. Removes needle from syringe in preparation for passing guide wire through the needle. | <b>0</b> | <b>2</b> |
